1 A haplotype-resolved draft genome of the European sardine (*Sardina*  
2 *pilchardus*)

3 Bruno Louro<sup>1\*</sup>; Gianluca De Moro<sup>1\*</sup>; Carlos Garcia<sup>1</sup>; Cymon J. Cox<sup>1</sup>; Ana Veríssimo<sup>2</sup>;  
4 Stephen J. Sabatino<sup>2</sup>; António M. Santos<sup>2</sup>; Adelino V. M. Canário<sup>1&</sup>

5 1 CCMAR Centre of Marine Sciences, University of Algarve, Campus de Gambelas,  
6 8005-139 Faro, Portugal.

7 2 CIBIO, Centro de Investigação em Biodiversidade e Recursos Genéticos, InBIO,  
8 Laboratório Associado, Universidade do Porto, Vairão, Portugal

9

10 \* authors contributed equally

11 & Corresponding author: Adelino V. M. Canário, e-mail: [acanario@ualg.pt](mailto:acanario@ualg.pt)

12

13 **Abstract**

14 **Background:** The European sardine (*Sardina pilchardus* Walbaum, 1792) has a  
15 high cultural and economic importance throughout its distribution. Monitoring studies  
16 of the sardine populations report an alarming decrease in stocks due to overfishing  
17 and environmental change. There is an urgent need to better understand the causal  
18 factors of this continuous decrease in the sardine stock, which has recorded a low  
19 historical level in the Iberian Atlantic coast. Important biological and ecological  
20 features such as levels of population diversity, structure, and migratory patterns can  
21 be addressed with the development and use of genomics resources. **Findings:** The  
22 sardine genome of a single female individual was sequenced using Illumina HiSeq X  
23 Ten 10X Genomics linked-reads generating 113.8Gb of sequencing data. Two

24 haploid and a consensus draft genomes were assembled, with a total size of 935  
25 Mbp (N50 103 Kb) and 950Mbp (N50 97 Kb), respectively. The genome  
26 completeness assessment captured 84% of Actinopterygii Benchmarking Universal  
27 Single-Copy Orthologs. To obtain a more complete analysis the transcriptomes of  
28 eleven tissues were sequenced and used to aid the functional annotation of the  
29 genome resulting in 29,408 genes predicted. Variant calling on nearly half of the  
30 haplotype genome resulted in the identification of more than 2.3 million phased  
31 SNPs with heterozygous loci. **Conclusions:** The sardine genome is a cornerstone  
32 for future population genomics studies, the results of which may be integrated into  
33 future sardine stock modelling to better manage this valuable resource.

34 **Keywords:** European sardine; *Sardina*; genome; transcriptome; haplotype; SNP

35

## 36 **Data description**

### 37 **Background**

38 The European sardine (*Sardina pilchardus* Walbaum, 1792) (Figure 1) is a small  
39 pelagic fish occurring in temperate boundary currents of the Northeast Atlantic down  
40 to Cape Verde off the west coast of Africa, and throughout the Mediterranean to the  
41 Black Sea. Two subspecies are generally recognised: *Sardina pilchardus pilchardus*  
42 occupies the north-eastern Atlantic and the North Sea whereas *S. pilchardus sardina*  
43 occupies the Mediterranean and Black seas, and the North African coasts south to  
44 Cape Verde, with a contact zone near the Strait of Gibraltar [1, 2]. As with other  
45 members of the Clupeidae family (e.g. herring, *Clupea harengus*, Allis shad, *Alosa*

46 *alosa*) [3], the sardine experiences strong population fluctuations, possibly reflecting  
47 environmental fluctuations, including climate change [4, 5].

48 The sardine is of major economic and social importance throughout its range with a  
49 reported commercial catch for 2016 of 72,183 tonnes in European waters. Indeed, in  
50 a country such as Portugal the sardine is an iconic and culturally revered fish which  
51 plays a central role in touristic events such as summer festivals throughout the  
52 country. However, recent fisheries data strongly suggests the Portuguese sardine  
53 fisheries are under threat. A recent report the International Council for the  
54 Exploration of the Sea [6] noted sharp decreases in the Iberian Atlantic coast sardine  
55 stock that resulted in ICES advice that catches in 2017 should be no more than  
56 23,000 tonnes. The sardine fishery biomass has suffered from a declining trend of  
57 annual recruitment between 1978 and 2006 and more recently it fluctuates around  
58 historically low values, with a high risk of collapse of the Iberian Atlantic stocks [6].

59 A number of sardine stocks have been identified by morphometric methods,  
60 including as many as five stocks in the north-eastern Atlantic (including the Azores),  
61 two off the Moroccan coast, and one in Senegalese waters [1, 7]. Each of these  
62 recognized sardine stocks is subjected to specific climatic and oceanic conditions,  
63 mainly during larval development and recruitment, which directly influence the  
64 recruitment of the sardine fisheries in the short term [4, 8, 9]. However, because of  
65 phenotypic plasticity, morphological traits are strongly influenced by environmental  
66 conditions and the underlying genetics that define those stocks has proven elusive  
67 [10]. While the recognition of subspecies and localised stocks might indicate  
68 significant genetic structuring of the population, the large population sizes and  
69 extensive migration of sardines are likely to increase gene flow and reduce

70 differences among stocks, suggesting, at its most extensive, a panmictic population  
71 with little genetic differentiation within the species' range [11].

72 It is now generally well established that to fully understand the genetic basis of  
73 evolutionarily and ecologically significant traits, the gene and regulatory element  
74 composition at the genomic level needs to be assessed [see e.g., 12, 13]. Therefore,  
75 here we provide a European sardine draft genome to serve as a tool for conservation  
76 and fisheries management, providing the essential context to assess the genetic  
77 structure of the sardine population(s) and for baseline studies of the genetic basis of  
78 the life-history and ecological traits of this small pelagic.

## 79 Genome sequencing

80 Sardines were caught during commercial operations in the coastal waters off Olhão,  
81 Portugal, and maintained live at the experimental fish culture facilities (EPPO) of the  
82 Portuguese Institute for the Sea and Atmosphere (IPMA) in Olhão, Portugal [14]. A  
83 single adult female was anesthetised with 2-phenoxyethanol (1:250 v/v), blood  
84 sampled with a heparinized syringe, and euthanized by cervical section. Eleven  
85 tissues were dissected out - gill plus branchial arch, liver, spleen, female gonad,  
86 midgut, white muscle, red muscle, kidney, head kidney, brain plus pituitary and  
87 caudal fin (including skin, scales, bone and cartilage) – into RNA<sub>later</sub> (Sigma-Aldrich,  
88 USA) at room temperature followed by storage at  $-20^{\circ}\text{C}$ . The tissue sampling was  
89 carried out in accordance with the Guidelines of the European Union Council  
90 (86/609/EU) and Portuguese legislation for the use of laboratory animals, under  
91 licence (Permit number 010238 from 19/04/2016) from the Veterinary Medicines  
92 Directorate (DGAV), the Portuguese competent authority for the protection of  
93 animals, Ministry of Agriculture, Rural Development and Fisheries, Portugal.

94 Total RNA was extracted using a total RNA purification kit (Maxwell® 16 Total RNA  
95 Purification Kit, Promega) and digested twice with DNase (DNA-free kit, Ambion,  
96 UK). The total RNA samples were kept at -80°C until shipment to the RNAseq  
97 service provider Admera Health Co. (USA) which confirmed a RIN above 8 (Qubit  
98 TapeStation) upon arrival. The mRNA library preparation was performed with  
99 NEBNext® Poly(A) mRNA Magnetic Isolation Module kit and NEBNext® Ultra™  
100 Directional RNA Library Prep kit for posterior sequencing using Illumina HiSeq 4000  
101 paired-end 150 bp cycle to generate about 596 million paired-end reads in total.

102 The genomic DNA (gDNA) was isolated from 20 µl of fresh blood using the DNeasy  
103 blood and tissue kit (Qiagen), followed by RNase treatment according to the  
104 manufacturer's protocol. The integrity of the gDNA was confirmed using pulsed-field  
105 gel electrophoresis and showed a molecular weight largely above 50 kbp. The gDNA  
106 was stored at -20°C before shipping to the service provider (genome.one,  
107 Darlinghurst, Australia). Microfluidic partitioned gDNA libraries using the 10x  
108 Genomics Chromium System were made using 0.6 ng of gDNA input. Sequencing  
109 (150bp paired-end cycle) was performed in a single lane of the Illumina HiSeq X Ten  
110 instrument (Illumina, San Diego, CA, USA). Chromium library size range (580-850  
111 bp) was determined with LabChip GX Touch (PerkinElmer) and library yield (6.5-40  
112  $\mu$ M) by quantitative polymerase chain reaction.

### 113 Genome size estimation

114 Seven hundred and fifty nine million paired-end reads were generated representing  
115 113.8 Gb nucleotide sequences with 76.1% bases  $\geq$  Q30. Raw reads were edited  
116 to trim 10X Genomics proprietary barcodes with a python script "filter\_10xReads.py"  
117 [15] prior to kmer counting with Jellyfish v2.2.10 [16]. Six hundred and seventy

118 million edited reads (90.5 Gb) were used to obtain the frequency distribution of 23-  
119 mers. The histogram of the kmer counting distribution was plotted in GenomeScope  
120 [17] (Figure 2) with maximum kmer coverage of 10,000 for estimation of genome  
121 size, heterozygosity and repeat content. The estimated sardine haploid genome size  
122 was 907Mbp with a repeat content of 40.7% and a heterozygosity level of 1.43%  
123 represented in the first peak of the distribution. These high levels of heterozygosity  
124 and repeat content indicated a troublesome genome characteristic of *de novo*  
125 assembly.

## 126 *De novo* genome assembly

127 The de-novo genome assembly was done using the paired-end sequence reads  
128 from the partitioned library as input for the Supernova assembly algorithm (version  
129 2.0.0(7fba7b4), 10x Genomics, San Francisco, CA, USA) [18] to output two  
130 haplotype-resolved genomes with phased scaffolds using the Supernova mkoutput  
131 pseudohap option. For the assembly process the Supernova run parameters for  
132 maximum reads (--maxreads) and barcode fraction (--barfrac) were set for 650M  
133 input reads and 80% of barcodes, respectively. Preliminary trials defined an optimal  
134 raw coverage of 78-fold, above the 56-fold suggested in the Supernova protocol; this  
135 allowed tackling (to some extent) the complexity of the high repeat content nature of  
136 the genome in the assembly (Table 1). Of the defined raw reads maximum input, a  
137 fraction of 607.36 million read pairs were used after a quality editing step embedded  
138 in the Supernova pipeline to remove reads that were not barcoded, not properly  
139 paired or low-quality reads. Input reads had a 138.5 bp mean length after proprietary  
140 10X barcode trimming and a N50 of 612 per barcode/DNA molecule (Table 1).

141 Further scaffolding and gap closure procedures were performed with Rails  
142 v1.2/Cobbler v0.3 pipeline script [19] to obtain the final consensus genome  
143 sequence using the parameters anchoring sequence length (*-d* 100) and minimum  
144 sequence identity (*-i* 0.95). Three scaffolding and gap procedures were performed  
145 iteratively with one haplotype of the initial assembly as the assembly *per se*, and  
146 previous *de novo* assemblies from Supernova (version 1.2.2), (315M/100% and  
147 450M/80% reads/barcodes). By closing several gaps within scaffolds and merging  
148 other scaffolds into longer and fewer scaffolds (117,259), this procedure resulted into  
149 a slightly longer genome size of 949.62 Mb, which deflated slightly the scaffold N50  
150 length to 96.6 Kb (Table 2).

151 The genome completeness assessment was estimated with Busco v3.0.1  
152 [20]. About 83.7% and 91.8% of the genome had significant matches against the  
153 actinopterygii and eukaryota odb9 databases, respectively. The actinopterygii.oddb9  
154 contains 4584 orthologs from 20 different species, and the eukaryota.oddb9 contains  
155 303 orthologs from sixty-five eukaryotic organisms.

156 The EMBRIC configurator service [21] was used to create a finfish checklist for the  
157 submission of the sardine genome project to the European Nucleotide Archive (ENA)  
158 (project accession PRJEB27990).

## 159 Repeat Content

160 The Spil assembly was used as a reference genome to build a *de novo* repeat library  
161 running RepeatModeler v1.0.11 [22] with default parameters. The model obtained  
162 from RepeatModeler was used, together with Dfam\_consensus database v.  
163 20171107 [23] and RepBase RepeatMasker Edition library v. 20170127 [24] to  
164 identify repetitive elements and low complexity sequences running RepeatMasker (v.

165 4.0.7) [25]. The analysis carried out revealed that 23.33% of the assembled genome  
166 harbours at least one repeat.

## 167 Genome annotation

168 The RNA-seq assembly, repetitive elements, protein homology and *ab initio* gene  
169 prediction were used in a custom annotation pipeline based on multiple runs of  
170 Maker v. 2.31.10 [26]. The final high quality gene models were obtained using a *de*  
171 *novo* trained set from SNAP v. 2006-07-28 [27], Augustus v. 3.3 [28] and the self-  
172 training software GeneMark v. 4.32 [29]. The trained file for SNAP was generated  
173 using the output of the first run of Maker and the Augustus run was trained using the  
174 specific option in Busco v3.0.1 [20]. The pipeline identified 29,408 genes.

175 Interproscan v. 5.30 [30] and NCBI blastp v. 2.6 [31] were used to functionally  
176 annotate the 30,169 predicted protein coding genes. Thirteen thousand five hundred  
177 and fifty nine (44.9%) proteins were successfully annotated using blastp (e-value 1e-  
178 05) against the SwissProt database [32] and another 2,499 were annotated using the  
179 NCBI non-redundant protein database (NR). In addition to the above, 17,132  
180 (56.8%) proteins were successfully annotated running interproscan with all the  
181 interpro v. 69.0 [33] databases (CDD, CATH-Gene3D, Hamap, PANTHER, Pfam,  
182 PIRSF, PRINTS, ProDom, ProSite Patterns, ProSite Profiles, SFLD, SMART,  
183 SUPERFAMILY, TIGRFAM). In total, 17,199 (65%) of the predicted proteins  
184 received a functional annotation. The annotated genome assembly is published [34]  
185 in the wiki-style annotation portal ORCAE [35].

## 186 Variant calling between phased alleles

187 FASTQ files were processed using 10x Genomics LongRanger v2.2.2 pipeline  
188 [36], defining as reference genome the longest one thousand scaffolds of the



189 Spil\_haplotype1 genome from the Supernova assembly, which represents about  
190 half of the genome (488.5Mb). The LongRanger pipeline was run with default  
191 setting beside the vcmode defining gatk v4.0.3.0 as the variant caller and the  
192 somatic parameters. The longest phase block was 2.86 Mb and the N50 phase  
193 block was 0.476 Mb.

194 Single nucleotide polymorphisms (SNP's) were furthered filtered to obtain  
195 only phased and heterozygous SNP's between the two alleles with a coverage  
196 higher than 10-fold using vcftools. A VCF file was obtained containing 2,369,617  
197 filtered SNPs (Additional file 1), in concordance with the estimated mean distance  
198 between heterozygous SNPs in the whole genome of 197 bp, by the Supernova  
199 input report.

## 200 *De novo* transcriptome assembly

201 Editing the 596 million paired-end raw reads for contamination (e.g. adapters) was  
202 done with the Trim Galore wrapper tool [37], low-quality base trimming with Cutadapt  
203 [38] and the output overall quality reports of the edited reads with FastQC [39].

204 The 553.2 million edited paired-end reads were *de novo* assembled using Trinity  
205 v2.5.1 [40] with a minimum contig length of 200 bp, 50x coverage read depth  
206 normalization, and RF strand-specific read orientation. The same parameters were  
207 used for each of the tissue specific *de novo* assemblies. The genome and  
208 transcriptome assemblies were conducted on the National Distributed Computing  
209 Infrastructure [41].

210 The twelve *de novo* transcriptome assemblies (Table 3) were quality  
211 assessed with TransRate v1.0.3 [42] for assembly optimization, including 11 tissue-  
212 specific assemblies and a multi-tissue assembly. The multi-tissue assembly with all

213 reads resulted in an assembled transcriptome of 170,478 transcript contigs  
214 following the TransRate step. Functional annotation was performed using the  
215 Trinotate pipeline [43] and integrated into a SQLite database. All annotation was  
216 based on the best deduced open reading frame (ORF) obtained with the  
217 Transdecoder v1.03 [44]. Of the 170,478 transcripts contigs, 27,078 (16%) were  
218 inferred to ORF protein sequences. Query of SwissProt (e-value cutoff of 1e-5) via  
219 blastx of total contigs resulted in 43,458 (26%) annotated transcripts. The ORFs  
220 were queried against SwissProt (e-value cutoff of 1e-5) via blastp and PFAM via  
221 HMMER v3.1b2 hmmscan [45] resulting in 19,705 (73% of ORF) and 16,538 (61% of  
222 ORF) SwissProt and PFAM annotated contigs respectively. The full annotation report  
223 with further functional annotation, such as signal peptides, transmembrane regions,  
224 egglog, Kyoto Encyclopedia of Genes and Genomes (KEGG), and Gene Ontology  
225 annotation are listed in tabular format in Additional file 2.

## 226 **Conclusion**

227 The genomic and transcriptomic resources here reported are important tools for  
228 future studies to understand sardine response at the levels of physiology, population  
229 and ecology of the causal factors responsible for the recruitment and collapse of the  
230 sardine stock in Iberian Atlantic coast. Besides the commercial interest, the sardine  
231 has a key trophic level bridging energy from the primary producers to the top  
232 predators in the marine ecosystem, and thus disruption of the population equilibrium  
233 is likely to reverberate throughout the food chain.

234 Despite an initial assessment of the sardine genome characteristics indicating a high  
235 level of repeats and heterozygosity, which poses a challenge to *de novo* genome  
236 assembly, a reasonable draft genome was obtained with the 10X Genomics linked-

237 reads technology. The ability to tag and cluster the reads to individual DNA  
238 molecules has proven to have similar advantages for scaffolding, as long reads  
239 technologies such as Nanopore and Pacific Biosciences, but with the advantage of  
240 high coverage and low error rates. The advantage for *de novo* genomic assemblies  
241 is evident in comparison to simple short read data, especially in the case of wild  
242 species with highly heterozygous genomes, resulting in many genomic regions  
243 uncaptured and with lower scaffolding yield due to repeated content.

244         The high heterozygosity identified here hints future problems in monitoring  
245 sardine populations using low resolution genetic data. However, the phased SNPs  
246 obtained in this study can be used to initiate the development of a SNP genetic panel  
247 for population monitoring, with SNPs representative of haplotype blocks, allowing  
248 insights into the patterns of linkage disequilibrium and the structure of haplotype  
249 blocks across populations.

## 250 **Availability of the supporting data**

251 Raw data, assembled transcriptomes, and assembled genomes are available at the  
252 European Bioinformatics Institute ENA archive with the project accession  
253 PRJEB27990. The annotated genome assembly is published in the wiki-style  
254 annotation portal ORCAE [34].

## 255 **Acknowledgements**

256 This research was supported by national funds from FCT - Foundation for Science  
257 and Technology through project UID/Multi/04326/2013 and by FCT and FEDER  
258 under projects 22153-01/SAICT/2016 (to INCD), ALG-01-0145-FEDER-022121 and  
259 ALG-01-0145-FEDER-022231. The EMBRIC configurator service received funding

260 from the European Union's Horizon 2020 research and innovation programme under  
261 grant agreement No 654008. The authors acknowledge Pedro Guerreiro for  
262 providing the sardine samples.

263

## 264 **References**

- 265 1. Parrish RH, Serra R and Grant WS. The monotypic sardines, *Sardina* and  
266 *Sardinops* - Their taxonomy, distribution, stock structure, and zoogeography.  
267 Can J Fish Aquat Sci. 1989;46 11:2019-36. doi:10.1139/f89-251.
- 268 2. Silva A. Morphometric variation among sardine (*Sardina pilchardus*)  
269 populations from the northeastern Atlantic and the western Mediterranean.  
270 ICES J Mar Sci. 2003;60 6:1352-60. doi:10.1016/S1054-3139(03)00141-3.
- 271 3. Lavoue S, Miya M, Saitoh K, Ishiguro NB and Nishida M. Phylogenetic  
272 relationships among anchovies, sardines, herrings and their relatives  
273 (Clupeiformes), inferred from whole mitogenome sequences. Mol Phylogenet  
274 Evol. 2007;43 3:1096-105. doi:10.1016/j.ympev.2006.09.018.
- 275 4. Santos AMP, Borges MDF and Groom S. Sardine and horse mackerel  
276 recruitment and upwelling off Portugal. ICES J Mar Sci. 2001;58 3:589-96.  
277 doi:10.1006/jmsc.2001.1060.
- 278 5. Checkley Jr. DM, Asch RG and Rykaczewski RR. Climate, Anchovy, and  
279 Sardine. Ann Rev Mar Sci. 2017;9 1:469-93. doi:10.1146/annurev-marine-  
280 122414-033819.
- 281 6. ICES. *Report of the Working Group on Southern Horse Mackerel, Anchovy*  
282 *and Sardine (WGHANSA), 24–29 June 2017, Bilbao, Spain. CM*  
283 *2017/ACOM:17, 640 p.* 2017.

- 284 7. Atarhouch T, Ruber L, Gonzalez EG, Albert EM, Rami M, Dakkak A, et al.  
285 Signature of an early genetic bottleneck in a population of Moroccan sardines  
286 (*Sardina pilchardus*). Mol Phylogenet Evol. 2006;39 2:373-83.  
287 doi:10.1016/j.ympev.2005.08.003.
- 288 8. Santos MB, Gonzalez-Quiros R, Riveiro I, Cabanas JM, Porteiro C and Pierce  
289 GJ. Cycles, trends, and residual variation in the Iberian sardine (*Sardina*  
290 *pilchardus*) recruitment series and their relationship with the environment.  
291 ICES J Mar Sci. 2012;69 5:739-50. doi:10.1093/icesjms/fsr186.
- 292 9. Leitao F, Alms V and Erzini K. A multi-model approach to evaluate the role of  
293 environmental variability and fishing pressure in sardine fisheries. J Mar Syst.  
294 2014;139:128-38. doi:10.1016/j.jmarsys.2014.05.013.
- 295 10. Tinti F, Di Nunno C, Guarniero I, Talenti M, Tommasini S, Fabbri E, et al.  
296 Mitochondrial DNA sequence variation suggests the lack of genetic  
297 heterogeneity in the Adriatic and Ionian stocks of *Sardina pilchardus*. Mar  
298 Biotechnol (NY). 2002;4 2:163-72. doi:10.1007/s10126-002-0003-3.
- 299 11. Jemaa S, Bacha M, Khalaf G, Dessailly D, Rabhi K and Amara R. What can  
300 otolith shape analysis tell us about population structure of the European  
301 sardine, *Sardina pilchardus*, from Atlantic and Mediterranean waters? J Sea  
302 Res. 2015;96:11-7. doi:10.1016/j.seares.2014.11.002.
- 303 12. Boehm JT, Waldman J, Robinson JD and Hickerson MJ. Population genomics  
304 reveals seahorses (*Hippocampus erectus*) of the western mid-Atlantic coast to  
305 be residents rather than vagrants. PLOS ONE. 2015;10 1:e0116219.  
306 doi:10.1371/journal.pone.0116219.

- 307 13. Hendricks S, Anderson EC, Antao T, Bernatchez L, Forester BR, Garner B, et  
308 al. Recent advances in conservation and population genomics data analysis.  
309 Evolutionary Applications. 2018;11 8:1197-211. doi:10.1111/eva.12659.
- 310 14. Marcalo A, Guerreiro PM, Bentes L, Rangel M, Monteiro P, Oliveira F, et al.  
311 Effects of different slipping methods on the mortality of sardine, *Sardina*  
312 *pilchardus*, after purse-seine capture off the Portuguese Southern coast  
313 (Algarve). PLoS One. 2018;13 5:e0195433.  
314 doi:10.1371/journal.pone.0195433.
- 315 15. UC Davis Bioinformatics Core [https://github.com/ucdavis-](https://github.com/ucdavis-bioinformatics/proc10xG)  
316 [bioinformatics/proc10xG](https://github.com/ucdavis-bioinformatics/proc10xG). Accessed 9/24/2018 2018.
- 317 16. Marcais G and Kingsford C. A fast, lock-free approach for efficient parallel  
318 counting of occurrences of k-mers. Bioinformatics. 2011;27 6:764-70.  
319 doi:10.1093/bioinformatics/btr011.
- 320 17. Vurture GW, Sedlazeck FJ, Nattestad M, Underwood CJ, Fang H, Gurtowski  
321 J, et al. GenomeScope: fast reference-free genome profiling from short reads.  
322 Bioinformatics. 2017;33 14:2202-4. doi:10.1093/bioinformatics/btx153.
- 323 18. Weisenfeld NI, Kumar V, Shah P, Church DM and Jaffe DB. Direct  
324 determination of diploid genome sequences. Genome Res. 2017;27 5:757-67.  
325 doi:10.1101/gr.214874.116.
- 326 19. Warren RL. RAILS and Cobbler: Scaffolding and automated finishing of draft  
327 genomes using long DNA sequences. J Open Source Soft. 2016;1 7:116.  
328 doi:10.21105/joss.00116.
- 329 20. Waterhouse RM, Seppey M, Simao FA, Manni M, Ioannidis P, Klioutchnikov  
330 G, et al. BUSCO applications from quality assessments to gene prediction

- 331 and phylogenomics. *Mol Biol Evol.* 2017;35 3:543-8.  
332 doi:10.1093/molbev/msx319.
- 333 21. EMBRIC Configurator Service. <http://www.embric.eu/node/1371>. Accessed  
334 9/24/2018.
- 335 22. Smit A and Hubley R: RepeatModeler Open-1.0. <http://www.repeatmasker.org>  
336 (2008). Accessed 9/24/2018.
- 337 23. Hubley R, Finn RD, Clements J, Eddy SR, Jones TA, Bao W, et al. The Dfam  
338 database of repetitive DNA families. *Nucleic Acids Res.* 2016;44 D1:D81-9.  
339 doi:10.1093/nar/gkv1272.
- 340 24. Bao W, Kojima KK and Kohany O. Repbase Update, a database of repetitive  
341 elements in eukaryotic genomes. *Mob DNA.* 2015;6 1:11.  
342 doi:10.1186/s13100-015-0041-9.
- 343 25. Smit A, Hubley R and Green P. 2013–2015. RepeatMasker Open-4.0. 2013.
- 344 26. Holt C and Yandell M. MAKER2: an annotation pipeline and genome-  
345 database management tool for second-generation genome projects. *BMC*  
346 *Bioinformatics.* 2011;12 1:491. doi:10.1186/1471-2105-12-491.
- 347 27. Korf I. Gene finding in novel genomes. *BMC Bioinformatics.* 2004;5 1:59.  
348 doi:10.1186/1471-2105-5-59.
- 349 28. Keller O, Kollmar M, Stanke M and Waack S. A novel hybrid gene prediction  
350 method employing protein multiple sequence alignments. *Bioinformatics.*  
351 2011;27 6:757-63. doi:10.1093/bioinformatics/btr010.
- 352 29. Lomsadze A, Burns PD and Borodovsky M. Integration of mapped RNA-Seq  
353 reads into automatic training of eukaryotic gene finding algorithm. *Nucleic*  
354 *Acids Res.* 2014;42 15:e119. doi:10.1093/nar/gku557.

- 355 30. Jones P, Binns D, Chang HY, Fraser M, Li W, McAnulla C, et al. InterProScan  
356 5: genome-scale protein function classification. *Bioinformatics*. 2014;30  
357 9:1236-40. doi:10.1093/bioinformatics/btu031.
- 358 31. Altschul SF, Gish W, Miller W, Myers EW and Lipman DJ. Basic local  
359 alignment search tool. *J Mol Biol*. 1990;215 3:403-10. doi:10.1016/S0022-  
360 2836(05)80360-2.
- 361 32. Apweiler R, Bairoch A, Wu CH, Barker WC, Boeckmann B, Ferro S, et al. m.  
362 *Nucleic Acids Res*. 2004;32 Database issue:D115-9. doi:10.1093/nar/gkh131.
- 363 33. Finn RD, Attwood TK, Babbitt PC, Bateman A, Bork P, Bridge AJ, et al.  
364 InterPro in 2017—beyond protein family and domain annotations. *Nucleic*  
365 *Acids Res*. 2016;45 D1:D190. doi:10.1093/nar/gkw1107.
- 366 34. Sardine Genome Annotation Portal.  
367 <http://bioinformatics.psb.ugent.be/orcae/overview/Spil>. Accessed 9/24/2018.
- 368 35. Sterck L, Billiau K, Abeel T, Rouze P and Van de Peer Y. ORCAE: online  
369 resource for community annotation of eukaryotes. *Nat Methods*. 2012;9  
370 11:1041. doi:10.1038/nmeth.2242.
- 371 36. Zheng GX, Lau BT, Schnall-Levin M, Jarosz M, Bell JM, Hindson CM, et al.  
372 Haplotyping germline and cancer genomes with high-throughput linked-read  
373 sequencing. *Nat Biotechnol*. 2016;34 3:303-11. doi:10.1038/nbt.3432.
- 374 37. Krueger F: "Trim galore" A wrapper tool around Cutadapt and FastQC to  
375 consistently apply quality and adapter trimming to FastQ files.  
376 [http://www.bioinformatics.babraham.ac.uk/projects/trim\\_galore/](http://www.bioinformatics.babraham.ac.uk/projects/trim_galore/) (2015).  
377 Accessed 9/24/2018.
- 378 38. Martin M. Cutadapt removes adapter sequences from high-throughput  
379 sequencing reads. *EMBnet journal*. 2011;17 1:10-2. doi:10.14806/ej.17.1.200.



- 380 39. Andrews S: FastQC: a quality control tool for high throughput sequence data.  
381 <http://www.bioinformatics.babraham.ac.uk/projects/fastqc/> (2010). Accessed  
382 9/24/2018.
- 383 40. Haas BJ, Papanicolaou A, Yassour M, Grabherr M, Blood PD, Bowden J, et  
384 al. De novo transcript sequence reconstruction from RNA-seq using the Trinity  
385 platform for reference generation and analysis. Nat Protoc. 2013;8 8:1494-  
386 512. doi:10.1038/nprot.2013.084.
- 387 41. INCD - National Distributed Computing Infrastructure is a digital infrastructure  
388 supporting research, approved within the framework of the strategic research  
389 infrastructures of the Science and Technology Foundation (FCT). .  
390 <http://www.incd.pt/?p=sobre-nos&lang=en>. Accessed 9/24/2018.
- 391 42. Smith-Unna R, Boursnell C, Patro R, Hibberd JM and Kelly S. TransRate:  
392 reference-free quality assessment of de novo transcriptome assemblies.  
393 Genome Res. 2016;26 8:1134-44. doi:10.1101/gr.196469.115.
- 394 43. Bryant DM, Johnson K, DiTommaso T, Tickle T, Couger MB, Payzin-Dogru D,  
395 et al. A Tissue-Mapped Axolotl De Novo Transcriptome Enables Identification  
396 of Limb Regeneration Factors. Cell Rep. 2017;18 3:762-76.  
397 doi:10.1016/j.celrep.2016.12.063.
- 398 44. TransDecoder identifies candidate coding regions within transcript sequences.  
399 <http://github.com/TransDecoder>. Accessed 9/24/2018.
- 400 45. Finn RD, Clements J and Eddy SR. HMMER web server: interactive  
401 sequence similarity searching. Nucleic Acids Res. 2011;39 Web Server  
402 issue:W29-37. doi:10.1093/nar/gkr367.  
403  
404

405 **Tables**

406

407 Table 1. List of descriptive metrics estimated by Supernova on the input sequence

408 data for the *de novo* genome assembly.

---

|                                         |           |
|-----------------------------------------|-----------|
| Number of paired reads used             | 607.36 M  |
| Mean read length after trimming         | 138.50 bp |
| Median insert size                      | 345 bp    |
| Weighted mean DNA molecule size         | 46.41 Kb  |
| N50 reads per barcode                   | 612       |
| Raw coverage                            | 78.35 X   |
| Effective read coverage                 | 52.91 X   |
| Mean distance between heterozygous SNPs | 197 bp    |

---

409

410

411

412 Table 2. Descriptive metrics of genome assemblies, the two haploids genomes  
 413 Spil\_haploid1 (ERZ724592) and Spil\_haploid2 (ERZ724593) assembled/scaffolded  
 414 solely by Supernova and the consensus genome Spil (GCA\_900492735.1)  
 415 assembled/scaffolded by Supernova plus Rails/Cobbler.

| Scaffolds      | Spil_haploid1    | Spil_haploid2    | Spil             |
|----------------|------------------|------------------|------------------|
| Largest        | 6 835 195 bp     | 6 849 541 bp     | 6 843 175 bp     |
| Number         |                  |                  |                  |
| >=100Kb        | 874              | 872              | 890              |
| >= 10Kb        | 8 301            | 8 298            | 8 760            |
| >= 1Kb (total) | 117 698          | 117 698          | 117 259          |
| L50 / N50      |                  |                  |                  |
| >=100Kb        | 135 / 905 971 bp | 134 / 925 166 bp | 137 / 899 108 bp |
| >= 10Kb        | 242 / 572 700 bp | 242 / 568 166 bp | 254 / 552 199 bp |
| >= 1Kb         | 859 / 102 905 bp | 860 / 102 672 bp | 903 / 96 617 bp  |
| Assembly size  |                  |                  |                  |
| >=100Kb        | 469 371 101 bp   | 468 838 424 bp   | 473 549 829 bp   |
| >= 10Kb        | 622 164 859 bp   | 621 688 061 bp   | 636 490 596 bp   |
| >= 1Kb         | 935 547 786 bp   | 935 081 460 bp   | 949 618 126 bp   |

416

417

418

419 Table 3 – Summary statistics of generated transcriptome data for the eleven tissues.

| Tissue                              | Paired raw reads | Contigs | CDS deduced | SwissProt annotated | Accession number |
|-------------------------------------|------------------|---------|-------------|---------------------|------------------|
| Gill/Branchial Arch                 | 29 783 994       | 62 526  | 29.3%       | 38.6%               | ERS2629269       |
| Liver                               | 33 479 471       | 53 104  | 29.7%       | 40.1%               | ERS2629273       |
| Spleen                              | 25 634 530       | 66 419  | 31.6%       | 40.4%               | ERS2629276       |
| Ovary                               | 22 241 327       | 42 521  | 38.1%       | 42.5%               | ERS2629270       |
| Midgut                              | 28 016 117       | 75 782  | 31.0%       | 39.5%               | ERS2629274       |
| White Muscle                        | 24 409 160       | 49 266  | 35.4%       | 44.8%               | ERS2629277       |
| Red Muscle                          | 30 653 774       | 55 873  | 30.3%       | 42.1%               | ERS2629275       |
| Kidney                              | 27 861 879       | 59 495  | 30.8%       | 37.3%               | ERS2629272       |
| Head Kidney                         | 25 280 960       | 65 888  | 32.2%       | 38.4%               | ERS2629271       |
| Brain/Pituitary                     | 24 467 352       | 75 620  | 24.5%       | 37.1%               | ERS2629267       |
| Caudal Fin<br>(Skin/Cartilage/Bone) | 26 342 097       | 64 832  | 23.9%       | 38.0%               | ERS2629268       |
| All Tissues                         | 298 170 661      | 170 478 | 15.9%       | 25.5%               | ERS2629362       |

420

421

## 422 Figure legends

423 Figure 1. European sardine (photo credit ©Citron / [CC BY-SA 3.0](#))

424

425 Figure 2. 23-mer depth distribution to estimate genome size (907Mb), repeat content  
426 (40.7%) and heterozygosity level (1.43%). Two kmer coverage peaks are observed  
427 at 28X and 50X.

428

429

## 430 Additional files

431 **Additional file 1.** Heterozygous SNPs identified in the phased haploid blocks listed  
432 in a VCF file format.

433

434 **Additional file 2.** Annotation of all tissues transcriptome assembly in a tabular  
435 format.

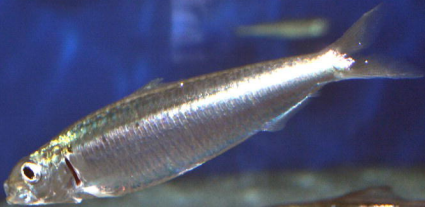

# GenomeScope Profile

len:907,057,586bp uniq:59.3% het:1.43% kcov:27.9 err:0.979% dup:2.57% k:23

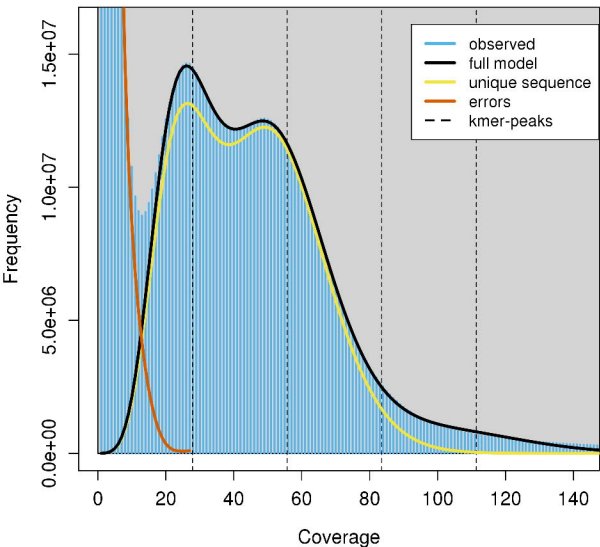

Source: https://www.biorxiv.org/content/10.1101/441774v1.full.pdf
