1 A haplotype-resolved draft genome of the European sardine (*Sardina*  
2 *pilchardus*)

3 Bruno Louro<sup>1\*</sup>; Gianluca De Moro<sup>1\*</sup>; Carlos Garcia<sup>1</sup>; Cymon J. Cox<sup>1</sup>; Ana Veríssimo<sup>2</sup>;  
4 Stephen J. Sabatino<sup>2</sup>; António M. Santos<sup>2</sup>; Adelino V. M. Canário<sup>1&</sup>

5 1 CCMAR Centre of Marine Sciences, University of Algarve, Campus de Gambelas,  
6 8005-139 Faro, Portugal.

7 2 CIBIO, Centro de Investigação em Biodiversidade e Recursos Genéticos, InBIO,  
8 Laboratório Associado, Universidade do Porto, Vairão, Portugal

9

10 \* authors contributed equally

11 & Corresponding author: Adelino V. M. Canário, e-mail: [acanario@ualg.pt](mailto:acanario@ualg.pt)

12

13 **Abstract**

14 **Background:** The European sardine (*Sardina pilchardus* Walbaum, 1792) has a  
15 high cultural and economic importance throughout its distribution. Monitoring studies  
16 of sardine populations report an alarming decrease in stocks due to overfishing and  
17 environmental change, which has resulted in historically low captures along the  
18 Iberian Atlantic coast. Consequently, there is an urgent need to better understand  
19 the causal factors of this continuing decrease in the sardine stock. Important  
20 biological and ecological features such as levels of population diversity, structure,  
21 and migratory patterns can be addressed with the development and use of genomics  
22 resources. **Findings:** The sardine genome of a single female individual was  
23 sequenced using Illumina HiSeq X Ten 10X Genomics linked-reads generating 113.8

24 Gb of data. Three draft genomes were assembled: two haploid genomes with a total  
25 size of 935 Mbp (N50 103Kb) each, and a consensus genome with a total size of  
26 950 Mbp (N50 97Kb). The genome completeness assessment captured 84% of  
27 Actinopterygii Benchmarking Universal Single-Copy Orthologs. To obtain a more  
28 complete analysis, the transcriptomes of eleven tissues were sequenced and used to  
29 aid the functional annotation of the genome, resulting in 40 777 genes predicted.  
30 Variant calling on nearly half of the haplotype genome resulted in the identification of  
31 more than 2.3 million phased SNPs with heterozygous loci. **Conclusions:** A draft  
32 genome was obtained with the 10X Genomics linked-reads technology, despite a  
33 high level of sequence repeats and heterozygosity that are expected genome  
34 characteristics of a wild sardine. The reference sardine genome and respective  
35 variant data are a cornerstone resource of ongoing population genomics studies to  
36 be integrated into future sardine stock assessment modelling to better manage this  
37 valuable resource.

38 **Keywords:** European sardine; *Sardina*; genome; transcriptome; haplotype; SNP

39

## 40 **Data description**

### 41 **Background**

42 The European sardine (*Sardina pilchardus* Walbaum, 1792) (NCBI:txid27697,  
43 Fishbase ID:1350) (Figure 1) is a small pelagic fish occurring in temperate boundary  
44 currents of the Northeast Atlantic down to Cape Verde off the west coast of Africa,  
45 and throughout the Mediterranean to the Black Sea [1]. Two subspecies are  
46 generally recognised: *Sardina pilchardus pilchardus* occupies the north-eastern

47 Atlantic and the North Sea whereas *S. pilchardus sardina* occupies the  
48 Mediterranean and Black seas, and the North African coasts south to Cape Verde,  
49 with a contact zone near the Strait of Gibraltar [1, 2]. As with other members of the  
50 Clupeidae family (e.g. herring, *Clupea harengus*, Fishbase ID:24) and allis shad  
51 (*Alosa alosa*, NCBI: txid278164, Fishbase ID:101) [3], the sardine experiences  
52 strong population fluctuations in abundance, possibly reflecting environmental  
53 fluctuations, including climate change [4, 5].

54 The sardine is of major economic and social importance throughout its range with a  
55 reported commercial catch for 2016 of 72 183 tonnes in European waters [6]. In  
56 Portugal, the sardine is an iconic and culturally revered fish and plays a central role  
57 in tourist events, such as summer festivals, throughout the country. However, recent  
58 stock assessment data strongly suggests the Iberian sardine fisheries is under  
59 threat. A recent report by the International Council for the Exploration of the Sea [6]  
60 noted a sharp decrease in the Iberian Atlantic coast sardine stock and advised that  
61 catches in 2017 should be no more than 23 000 tonnes. The sardine fishery biomass  
62 has suffered from declining annual recruitment between 1978 and 2006, and more  
63 recently, it has fluctuated around historically low values indicating a high risk of  
64 collapse of the Iberian Atlantic stocks [6].

65 A number of sardine populations have been identified by morphometric methods,  
66 including as many as five populations in the north-eastern Atlantic (including the  
67 Azores), two off the Moroccan coast, and one in Senegalese waters [1, 7]. Each of  
68 these recognized sardine populations is subjected to specific climatic and oceanic  
69 conditions, mainly during larval development, which directly influence the recruitment  
70 of the sardine fisheries [4, 8, 9]. However, because of phenotypic plasticity,  
71 morphological traits are strongly influenced by environmental conditions and the

72 underlying genetics that define those populations has proven elusive [10]. While the  
73 recognition of subspecies and localised populations might indicate significant genetic  
74 structure, the large population sizes and extensive migration of sardines are likely to  
75 increase gene flow and reduce population differences, suggesting, at its most  
76 extensive, a panmictic population with little genetic differentiation within the species'  
77 range [11].

78 It is now well established that to fully understand the genetic basis of evolutionarily  
79 and ecologically significant traits, the gene and regulatory element composition of  
80 different individuals or populations needs to be assessed [see e.g., 12, 13].  
81 Therefore, we provide a European sardine draft genome, providing the essential tool  
82 to assess the genetic structure of the sardine population(s) and for genetic studies of  
83 the life-history and ecological traits of this small pelagic fish, which will be  
84 instrumental for conservation and fisheries management.

## 85 Genome sequencing

86 Sardines were caught during commercial fishing operations in the coastal waters off  
87 Olhão, Portugal, and maintained live at the experimental fish culture facilities (EPPO)  
88 of the Portuguese Institute for the Sea and Atmosphere (IPMA), Olhão, Portugal [14].  
89 A single adult female was anaesthetised with 2-phenoxyethanol (1:250 v/v), blood  
90 was collected in a heparinized syringe, and the fish euthanized by cervical section.  
91 Eleven tissues were dissected out - gill together with branchial arch, liver, spleen,  
92 ovary, midgut, white muscle, red muscle, kidney, head kidney, brain together with  
93 pituitary, and caudal fin (including skin, scales, bone and cartilage) – into RNA<sup>later</sup>  
94 (Sigma-Aldrich, USA) at room temperature followed by storage at  $-20^{\circ}\text{C}$ . Fish  
95 maintenance and sample collection were carried out in accordance with the

96 guidelines of the European Union Council (86/609/EU) and Portuguese legislation for  
97 the use of laboratory animals from the Veterinary Medicines Directorate (DGAV), the  
98 Portuguese competent authority for the protection of animals, Ministry of Agriculture,  
99 Rural Development and Fisheries, Portugal (permit 010238 of 19/04/2016).

100 Total RNA was extracted using a total RNA purification kit (Maxwell® 16 Total RNA  
101 Purification Kit, Promega) and digested twice with DNase (DNA-free kit, Ambion,  
102 UK). The total RNA samples were kept at -80°C until shipment to the RNAseq  
103 service provider Admera Health Co. (USA) which confirmed a RIN above 8 (Qubit  
104 TapeStation) upon arrival. The mRNA library preparation was performed with  
105 NEBNext® Poly(A) mRNA Magnetic Isolation Module kit and NEBNext® Ultra™  
106 Directional RNA Library Prep kit for sequencing using Illumina HiSeq 4000 paired-  
107 end 150 bp cycle to generate about 596 million paired-end reads in total.

108 The genomic DNA (gDNA) was isolated from 20 µl of fresh blood using the DNeasy  
109 blood and tissue kit (Qiagen), followed by RNase treatment according to the  
110 manufacturer's protocol. The integrity of the gDNA was confirmed using pulsed-field  
111 gel electrophoresis and showed fragment sizes largely above 50 kbp. The gDNA  
112 was stored at -20°C before shipping to the service provider (Genome.one,  
113 Darlinghurst, Australia). Microfluidic partitioned gDNA libraries using the 10x  
114 Genomics Chromium System were made using 0.6 ng of gDNA input. Sequencing  
115 (150bp paired-end cycle) was performed in a single lane of the Illumina HiSeq X Ten  
116 instrument (Illumina, San Diego, CA, USA). Chromium library size range (580-850  
117 bp) was determined with LabChip GX Touch (PerkinElmer) and library yield (6.5-40  
118 µM) by quantitative polymerase chain reaction.

## 119 Genome size estimation

120 A total of 759 million paired-end reads were generated representing 113.8 Gb  
121 nucleotide sequences with 76.1% bases  $\geq$  Q30. Raw reads were edited to trim 10X  
122 Genomics proprietary barcodes with a python script “filter\_10xReads.py” [15] prior to  
123 kmer counting with Jellyfish v2.2.10 (Jellyfish, RRID:SCR\_005491) [16]. Six hundred  
124 and seventy million edited reads (90.5 Gb) were used to obtain the frequency  
125 distribution of 23-mers. The histogram of the kmer counting distribution was plotted  
126 in GenomeScope v1.0.0 (Genoscope, RRID:SCR\_002172) [17] (Figure 2) with  
127 maximum kmer coverage of 10 000 for estimation of genome size, heterozygosity  
128 and repeat content. The estimated sardine haploid genome size was 907 Mbp with a  
129 repeat content of 40.7% and a heterozygosity level of 1.43% represented in the first  
130 peak of the distribution. These high levels of heterozygosity and repeat content  
131 indicated a troublesome genome characteristic for *de novo* assembly.

## 132 *De novo* genome assembly

133 The *de novo* genome assembly was performed using the paired-end sequence  
134 reads from the partitioned library as input for the Supernova assembly algorithm  
135 v2.0.0(7fba7b4) (Supernova assembler, RRID:SCR\_016756) (10x Genomics, San  
136 Francisco, CA, USA) [18]. Two haplotype-resolved genomes, SP\_haploid1 (ENA  
137 accession ID UOTT01000000) and SP\_haploid2 (ENA accession ID  
138 UOTU01000000), were assembled with phased scaffolds using the Supernova  
139 “mkoutput pseudohap” option. For the assembly process the Supernova run  
140 parameters for maximum reads (--maxreads) and barcode fraction (--barfrac) were  
141 set for 650M input reads and 80% of barcodes, respectively. Preliminary trials  
142 defined an optimal raw coverage of 78-fold, above the 56-fold suggested in the

143 Supernova protocol; this reduced the problem (to some extent) of the complexity of  
144 the high repeat content (Table 1). A fraction of the 607.36 million read pairs were  
145 used after a quality control step embedded in the Supernova pipeline to remove  
146 reads that were not barcoded, not properly paired, or low-quality. Input reads had a  
147 138.5 bp mean length after proprietary 10X barcode trimming and a N50 of 612 per  
148 barcode/DNA molecule (Table 1).

149 Further scaffolding and gap closure procedures were performed with Rails  
150 v1.2/Cobbler v0.3 pipeline script [19] to obtain the final consensus genome  
151 sequence named SP\_G (ENA accession ID GCA\_900499035.1) using the  
152 parameters anchoring sequence length (*-d* 100) and minimum sequence identity (*-i*  
153 0.95). Three scaffolding and gap closure procedures were performed iteratively with  
154 one haplotype of the initial assembly as the assembly *per se*, and previous *de novo*  
155 assemblies from Supernova v1.2.2, (315M/100% and 450M/80% reads/barcodes).  
156 By closing several gaps within scaffolds and merging other scaffolds into longer and  
157 fewer scaffolds (117 259), this procedure resulted into a slightly longer genome size  
158 of 949.62 Mb, which slightly deflated the scaffold N50 length to 96.6 Kb (Table 2).  
159 The assembly metrics of the three assemblies are described in Table 2 together with  
160 a recently published Illumina paired-end assembled sardine genome (UP\_Spi) [20].  
161 The total assembly size of our genome (SP\_G) is 950 Mb and the UP\_Spi is 641 Mb  
162 (Table 2). Because the SP\_G and UP\_Spi assembly sizes are of different orders of  
163 magnitude, in addition to N50 we present NG50 values [21] for an estimated genome  
164 size of 950 Mb (Table 2). In the SP\_G assembly, 905 scaffolds (LG50) represents  
165 half of the estimated genome with an NG50 value of 96.6 Kb, in comparison to LG50  
166 of 15 422 and NG50 of 12.6 Kb in the UP\_Spi assembly. The ungapped length of the  
167 SP\_G assembly is 828 Mb. The larger gaps of the SP\_G assembly compared to the

168 UP\_Spi can be explained by the Supernova being able to estimate gap size based  
169 on the bar codes spanning the gaps, i.e. gaps have linkage evidence through the  
170 barcodes linking reads to DNA molecules and not solely gaps based on reads pairs  
171 [22]. Such gaps are reflected in the large number of N's per 100kb in our assemblies  
172 (Table 2). The number of scaffolds in SP\_G is 117 259 (largest 6.843 Mb) and in  
173 UP\_Spi is 44 627 (largest 0.285 Mb).

174 The genome completeness assessment was estimated with Benchmarking Universal  
175 Single-copy Orthologs (BUSCO) v3.0.1 (BUSCO, RRID:SCR\_015008) [23]. The  
176 genome was queried (options -m geno -sp zebrafish) against the “metazoa.odbg9”  
177 lineage set containing 978 orthologs from sixty-five eukaryotic organisms to assess  
178 the coverage of core eukaryotic genes, and against the “actinopterygii.odbg9” lineage  
179 set containing 4584 orthologs from 20 different ray-finned fish species as the most  
180 taxon-specific lineage available for the sardine. Using the metazoan odb9 database,  
181 95.4% of the genome had significant matches: 84.5% were complete genes (76.7%  
182 single-copy genes and 9.8% duplicates) and 8.9% were fragmented genes. By  
183 contrast, using the actinopterygii odb9 database, 84.2% (76.0% complete genes and  
184 8.2% fragmented) had a match, with 69.3% of genes occurring as single copy and  
185 6.7% as duplicates.

186 The EMBRIC configurator service [24] was used to create a fish specific checklist  
187 (named finfish) for the submission of the sardine genome project to the European  
188 Nucleotide Archive (ENA) (European Nucleotide Archive, RRID:SCR\_006515)  
189 (project accession PRJEB27990).



## 190 Repeat Content

191 The SP\_G consensus assembly was used as a reference genome to build a *de novo*  
192 repeat library running RepeatModeler v1.0.11 (RepeatModeler, RRID:SCR\_015027)  
193 [25] with default parameters. The model obtained from RepeatModeler was used,  
194 together with Dfam\_consensus database v20171107 [26] and RepBase  
195 RepeatMasker Edition library v20170127 [27] to identify repetitive elements and low  
196 complexity sequences running RepeatMasker v4.0.7 (RepeatMasker,  
197 RRID:SCR\_012954) [28]. The analysis carried out revealed that 23.33% of the  
198 assembled genome consists of repetitive elements.

## 199 Genome annotation

200 The Maker v2.31.10 (MAKER, RRID:SCR\_005309) [29] pipeline was used iteratively  
201 (five times) to annotate the SP\_G consensus genome. The annotations generated in  
202 each iteration were kept in the succeeding annotation steps and in the final General  
203 Feature Format (GFF) file. During the first Maker run the *de novo* transcriptome was  
204 mapped to the genome using blastn v2.7.1 (BLASTN, RRID:SCR\_001598) [30]  
205 (est2genome parameter in Maker). Moreover, the repetitive elements found with  
206 RepeatMasker were used in the Maker pipeline. This initial gene models created by  
207 Maker were then used to train Hidden Markov Model (HMM) based gene predictors.  
208 The preliminary GFF file generated by this first iteration run was used as input to  
209 train SNAP v2006-07-28 [31]. Using the scripts provided directly by Maker  
210 (maker2zff) and SNAP (fathom, forge and hmm-assembler.pl) an HMM file was  
211 created and used as input for the next Maker iteration (snaphmm option in maker  
212 configuration file). For the next iteration, the gene-finding software Augustus v3.3  
213 (Augustus, RRID:SCR\_008417) [32] was self-trained running BUSCO with the

214 specific parameter (--long), that turn on the Augustus optimization mode for self-  
215 training. The resulted predicted species model from Augustus was included in the  
216 pipeline in the third Maker run. For the fourth iteration, GeneMark-ES v4.32  
217 (GeneMark, RRID:SCR\_011930) [33], a self-training gene prediction software, was  
218 executed and the resulting HMM file was integrated into the Maker pipeline. As  
219 further evidence for the annotation, in the last run of Maker, the genome was queried  
220 using blastx v2.7.1 (BLASTX, RRID:SCR\_001653) (protein2genome parameter in  
221 Maker), against the deduced proteomes of herring (GCF\_000966335.1), (*Clupea*  
222 *harengus*, NCBI:txid7950, Fishbase ID:24) zebrafish (*Danio rerio*, NCBI:txid7955,  
223 Fishbase ID:4653) (GCF\_000002035.6), blind cave fish (*Astyanax mexicanus*,  
224 NCBI:txid7994, Fishbase ID:2740) (GCF\_000372685.2), European sardine [20] and  
225 all proteins from teleost fishes in the UniProtKB/Swiss-Prot database (UniProtKB,  
226 RRID:SCR\_004426) [34]. After the five Maker runs the selected 40 777 genes  
227 models are the *ab initio* predictions supported by the transcriptome and proteome  
228 evidence. Based on the transcriptomic evidence, 12 761 gene models were  
229 annotated with untranslated regions (UTR) features, more specifically 9 486 gene  
230 models with either 5' or 3' UTR and 3 275 gene models with both UTR features.

231 InterProScan v. 5.30 (InterProScan, RRID:SCR\_005829) [35] and NCBI blastp  
232 v2.8.1 (BLASTP, RRID:SCR\_001010) [30] were used to functionally annotate the 40  
233 777 predicted protein coding genes. Thirty-three thousand five hundred and fifty-  
234 three (33 553) (82.3%) proteins were successfully annotated using blastp (e-value  
235 1e-05) against the UniProtKB/Swiss-Prot database and another 5 228 were  
236 annotated using the NCBI non-redundant protein database (nr). In addition to the  
237 above, 37 075 (90.9%) proteins were successfully annotated using InterProScan  
238 with all the InterPro v72.0 (InterPro, RRID:SCR\_006695) [36] databases: CATH-

239 Gene3D (Gene3D, RRID:SCR\_007672), Hamap (HAMAP, RRID:SCR\_007701),  
240 PANTHER (PANTHER, RRID:SCR\_004869), Pfam (Pfam, RRID:SCR\_004726),  
241 PIRSF (PIRSF, RRID:SCR\_003352), PRINTS (PRINTS, RRID:SCR\_003412),  
242 ProDom (ProDom, RRID:SCR\_006969), ProSite Patterns (PROSITE,  
243 RRID:SCR\_003457), ProSite Profiles, SFLD (Structure-function linkage database,  
244 RRID:SCR\_001375), SMART (SMART, RRID:SCR\_005026), SUPERFAMILY  
245 (SUPERFAMILY, RRID:SCR\_007952), and TIGRFAM (JCVI TIGRFAMS,  
246 RRID:SCR\_005493). In total, 38 880 (95.3%) of the predicted proteins received a  
247 functional annotation. The annotated genome assembly is published [37] in the wiki-  
248 style annotation portal ORCAE [38] .

249 OrthoFinder v2.2.7 [39] was used to identify paralogy and orthology in our Swiss-prot  
250 annotated deduced proteome and in the deduced proteomes from herring, blind cave  
251 fish and zebrafish. The resulting orthogroups were plotted using jvenn (jVenn,  
252 RRID:SCR\_016343) [40] (Figure 3), where paralogous (two or more genes) and  
253 singletons were identified within species specific orthogroups. The deduced  
254 sardine proteome has 3 413 paralogous groups containing 11 406 genes, of which  
255 31 are sardine specific orthogroups. The amount of sardine singletons (9 856) can  
256 be partially due to fragmented predicted genes, but can reflect also some  
257 evolutionary divergence which requires further study to understand the biological  
258 relevance. In total, 25 560 orthogroups containing at least a single protein were  
259 identified in sardine, of which 12 958 orthogroups are common to all four fish  
260 species. Within the Clupeidae, the sardine and the herring share 14 780 orthogroups  
261 with 922 family-specific orthogroups.

## 262 Variant calling between phased alleles

263 FASTQ files were processed using the 10x Genomics LongRanger v2.2.2 pipeline  
264 [41] with a maximum input limit of one thousand scaffolds, defined as reference  
265 genome, and representing about half of the genome size (488.5 Mb). The  
266 LongRanger pipeline was run with default settings, with the exception of vcmode  
267 to define the Genome Analysis Toolkit (GATK) v4.0.3.0 (GATK,  
268 RRID:SCR\_001876) [42] as the variant caller and the somatic parameters. The  
269 longest phase block was 2.86 Mb and the N50 phase block was 0.476 Mb.

270 Single nucleotide polymorphisms (SNP's) were further filtered to obtain only  
271 phased and heterozygous SNP's between the two alleles with a coverage higher  
272 than 10-fold using VCFtools v0.1.16 (VCFtools, RRID:SCR\_001235). A VCF file was  
273 obtained containing 2 369 617 filtered SNPs (Additional file 1) resulting in a mean  
274 distance between heterozygous phased SNPs of 206 bp. Similar results were  
275 obtained in the Supernova input report estimation (Table 1) of mean distance  
276 between heterozygous SNPs in the whole genome of 197 bp. This high SNP  
277 heterozygosity (1/206), observed solely in the comparison of the phased alleles, is  
278 higher than the average nucleotide diversity of the previously reported marine fish of  
279 wild populations: 1/390 in yellow drum [43], 1/309 in herring [44], 1/435 in coelacanth  
280 [45], 1/500 in cod [46] and 1/700 in stickleback [47].

## 281 *De novo* transcriptome assembly

282 The 596 million paired-end raw transcriptomic reads were edited for contamination  
283 (e.g. adapters) using TrimGalore v0.4.5 wrapper tool (TrimGalore,  
284 RRID:SCR\_016946) [15], low-quality base trimming with Cutadapt v1.15 (cutadapt,

285 RRID:SCR\_011841) [48] and the output overall quality reports of the edited reads  
286 with FastQC v0.11.5 (FastQC, RRID:SCR\_014583) [49].

287 The 553 million edited paired-end reads were *de novo* assembled as a multi-tissue  
288 assembly using Trinity v2.5.1 (Trinity, RRID:SCR\_013048) [50] with a minimum  
289 contig length of 200 bp, 50x coverage read depth normalization, and RF strand-  
290 specific read orientation. The same parameters were used for each of the 11 tissue  
291 specific *de novo* assemblies. The genome and transcriptome assemblies were  
292 conducted on the Portuguese National Distributed Computing Infrastructure [49].

293 The twelve *de novo* transcriptome assemblies (Table 3) were each quality assessed  
294 using TransRate v1.0.3 [51] with read evidence for assembly optimization, by  
295 specifying the contigs fasta file and respective left and right edited reads to be  
296 mapped. The multi-tissue assembly with all reads resulted in an assembled  
297 transcriptome of 170 478 transcript contigs following the TransRate step. Functional  
298 annotation was performed using the Trinotate v3.1.1 pipeline [24] and integrated into  
299 a SQLite database. All annotations were based on the best deduced open reading  
300 frame (ORF) obtained with the Transdecoder v1.03 [51]. Of the 170 478 transcripts  
301 contigs, 27 078 (16%) were inferred to ORF protein sequences. Query of the  
302 UniProtKB/Swiss-Prot (e-value cutoff of 1e-5) database via blastx v2.7.1 of total  
303 contigs resulted in 43 458 (26%) annotated transcripts. The ORFs were queried  
304 against UniProtKB/Swiss-Prot (e-value cutoff of 1e-5) via blastp v2.7.1 and PFAM  
305 using hmmscan (HMMER v3.1b2) (Hmmer, RRID:SCR\_005305) [52] resulting in 19  
306 705 (73% of ORF) and 16 538 (61% of ORF) UniProtKB/Swiss-Prot and PFAM  
307 annotated contigs respectively. The full annotation report with further functional  
308 annotation, such as signal peptides, transmembrane regions, eggnoG, Kyoto  
309 Encyclopedia of Genes and Genomes (KEGG) (KEGG, RRID:SCR\_012773), and

310 Gene Ontology annotation (Gene Ontology, RRID:SCR\_002811) are listed in tabular  
311 format in Additional file 2.

## 312 **Ray-finned fish phylogeny**

313 We conducted a phylogenetic analysis of ray-finned fish (Actinopterygii) taxa based  
314 on 17 fish species. The sardine protein data set used in the phylogenetic analysis  
315 was obtained by querying the deduced proteins from our sardine genome against the  
316 one-to-one orthologous cluster dataset (106 proteins from 17 species) obtained from  
317 [20].

318 For the query, gene models were constructed for each protein with hmmbuild  
319 (HMMER v3.1b2) [53] using default options and the orthologous genes from the  
320 deduced sardine proteome were searched using hmmsearch (HMMER) with an e-  
321 value cutoff of 10e-3. The best protein hits, as indicated by the bitscores, were  
322 aligned to the original protein sequence alignments using hmalign (HMMER) with  
323 default options. Gapped and poorly aligned sites were identified by Gblocks v0.91b  
324 (Gblocks, RRID:SCR\_015945) [54] using default options and removed using p4  
325 v1.3.0 [55]. Protein alignment statistics were calculated, and the proteins  
326 concatenated into a single alignment using novel scripts in p4. Of the 106 fish  
327 proteins alignments, 97 contained sites which were considered correctly aligned by  
328 the Gblocks analysis; statistics for these alignments are presented in Table S1  
329 (Additional file 3). The concatenated sequence alignment of the 97 proteins  
330 contained 14 515 sites without gaps of which 7 391 were constant, 7 123 variable,  
331 and 3 879 parsimony informative.

332 The best-fitting empirical protein model of the concatenated data was evaluated  
333 using ModelFinder [56] in IQ-TREE v1.6.7.1 [57]. The best-fitting empirical

334 substitution model was estimated to be the JTT model [58] with a discrete gamma-  
335 distribution of among-site rate variation (4 categories) and empirical composition  
336 frequencies (typical notation: JTT+ $\Gamma_4$ +F).

337 Optimal maximum likelihood tree searches (100 replicates) and bootstrap analyses  
338 (300 replicates) were conducted using RAxML v8.2.12 (RAxML, RRID:SCR\_006086)  
339 [59] with the best-fitting model. The optimal maximum likelihood tree (-ln likelihood:  
340 146565.6438) is presented in Figure 4 with bootstrap support values given at nodes,  
341 and is rooted to the outgroups *Petromyzon marinus* (lamprey) and *Latimeria*  
342 *chalumnae* (coelacanth).

343

## 344 **Conclusion**

345 Despite the sardine genome having a high level of repeats and heterozygosity,  
346 factors which pose a challenge to *de novo* genome assembly, a more than adequate  
347 draft genome was obtained with the 10X Genomics linked-reads (Chromium)  
348 technology. The Chromium technology's ability to tag and cluster the reads to  
349 individual DNA molecules has proven advantages for scaffolding, just as long reads  
350 technologies such as Nanopore and Pacific Biosciences, but with high coverage and  
351 low error rates. The advantage of linked-reads for *de novo* genomic assemblies is  
352 evident in comparison to typical short read data, especially in the case of wild  
353 species with highly heterozygous genomes, where the latter often result in many  
354 uncaptured genomic regions and with a lower scaffolding yield due to repeated  
355 content.

356 The high degree of heterozygosity identified here in the sardine genome illustrates  
357 future problems for monitoring sardine populations using low-resolution genetic data.

358 However, the phased SNPs obtained in this study can be used to initiate the  
359 development of a SNP genetic panel for population monitoring, with SNPs  
360 representative of haplotype blocks, allowing insights into the patterns of linkage  
361 disequilibrium and the structure of haplotype blocks across populations.

362 The genomic and transcriptomic resources reported here are important tools for  
363 future studies to understand sardine response at the levels of physiology, population  
364 genetics and ecology of the causal factors responsible for the recruitment and  
365 collapse of the sardine stock in Iberian Atlantic coast. Besides the commercial  
366 interest, the sardine plays a crucial role at a key trophic level by bridging energy from  
367 the primary producers to the top predators in the marine ecosystem. Therefore,  
368 disruption of the sardine population equilibrium is likely to reverberate throughout the  
369 food chain via a trophic cascade. Consequently, these genomic and genetic  
370 resources are the prerequisites needed to develop tools to monitor the population  
371 status of the sardine and thereby provide an important bio-monitoring system for the  
372 health of the marine environment.

### 373 **Availability of the supporting data**

374 Raw data, assembled transcriptomes, and assembled genomes are available at the  
375 European Bioinformatics Institute ENA archive with the project accession  
376 PRJEB27990. The annotated genome assembly is published in the wiki-style  
377 annotation portal ORCAE [37].

### 378 **Acknowledgements**

379 This research was supported by national funds from FCT - Foundation for Science  
380 and Technology through project UID/Multi/04326/2016 and by FCT and FEDER



381 under projects 22153-01/SAICT/2016 (to INCD), ALG-01-0145-FEDER-022121 and  
382 ALG-01-0145-FEDER-022231; and co-funds from MAR2020 operational programme  
383 of the European Maritime and Fisheries Fund (project SARDINOMICS MAR-  
384 01.04.02-FEAMP-0024). The EMBRIC configurator service received funding from the  
385 European Union's Horizon 2020 research and innovation programme under grant  
386 agreement No 654008. The authors acknowledge Pedro Guerreiro for providing the  
387 sardine samples.

388

## 389 **References**

- 390 1. Parrish RH, Serra R and Grant WS. The monotypic sardines, *Sardina* and  
391 *Sardinops* - Their taxonomy, distribution, stock structure, and zoogeography.  
392 Can J Fish Aquat Sci. 1989;46 11:2019-36. doi:10.1139/f89-251.
- 393 2. Silva A. Morphometric variation among sardine (*Sardina pilchardus*)  
394 populations from the northeastern Atlantic and the western Mediterranean.  
395 ICES J Mar Sci. 2003;60 6:1352-60. doi:10.1016/S1054-3139(03)00141-3.
- 396 3. Lavoue S, Miya M, Saitoh K, Ishiguro NB and Nishida M. Phylogenetic  
397 relationships among anchovies, sardines, herrings and their relatives  
398 (Clupeiformes), inferred from whole mitogenome sequences. Mol Phylogenet  
399 Evol. 2007;43 3:1096-105. doi:10.1016/j.ympev.2006.09.018.
- 400 4. Santos AMP, Borges MDF and Groom S. Sardine and horse mackerel  
401 recruitment and upwelling off Portugal. ICES J Mar Sci. 2001;58 3:589-96.  
402 doi:10.1006/jmsc.2001.1060.
- 403 5. Checkley Jr. DM, Asch RG and Rykaczewski RR. Climate, anchovy, and  
404 sardine. Annual Review of Marine Science. 2017;9 1:469-93.  
405 doi:10.1146/annurev-marine-122414-033819.

- 406 6. ICES. *Report of the Working Group on Southern Horse Mackerel, Anchovy*  
407 *and Sardine (WGHANSA), 24–29 June 2017, Bilbao, Spain. CM*  
408 *2017/ACOM:17, 640 p.* 2017.
- 409 7. Atarhouch T, Ruber L, Gonzalez EG, Albert EM, Rami M, Dakkak A, et al.  
410 Signature of an early genetic bottleneck in a population of Moroccan sardines  
411 (*Sardina pilchardus*). *Mol Phylogenet Evol.* 2006;39 2:373-83.  
412 doi:10.1016/j.ympev.2005.08.003.
- 413 8. Santos MB, Gonzalez-Quiros R, Riveiro I, Cabanas JM, Porteiro C and Pierce  
414 GJ. Cycles, trends, and residual variation in the Iberian sardine (*Sardina*  
415 *pilchardus*) recruitment series and their relationship with the environment.  
416 *ICES J Mar Sci.* 2012;69 5:739-50. doi:10.1093/icesjms/fsr186.
- 417 9. Leitao F, Alms V and Erzini K. A multi-model approach to evaluate the role of  
418 environmental variability and fishing pressure in sardine fisheries. *J Mar Syst.*  
419 2014;139:128-38. doi:10.1016/j.jmarsys.2014.05.013.
- 420 10. Tinti F, Di Nunno C, Guarniero I, Talenti M, Tommasini S, Fabbri E, et al.  
421 Mitochondrial DNA sequence variation suggests the lack of genetic  
422 heterogeneity in the Adriatic and Ionian stocks of *Sardina pilchardus*. *Mar*  
423 *Biotechnol (NY).* 2002;4 2:163-72. doi:10.1007/s10126-002-0003-3.
- 424 11. Jemaa S, Bacha M, Khalaf G, Dessailly D, Rabhi K and Amara R. What can  
425 otolith shape analysis tell us about population structure of the European  
426 sardine, *Sardina pilchardus*, from Atlantic and Mediterranean waters? *J Sea*  
427 *Res.* 2015;96:11-7. doi:10.1016/j.seares.2014.11.002.
- 428 12. Boehm JT, Waldman J, Robinson JD and Hickerson MJ. Population genomics  
429 reveals seahorses (*Hippocampus erectus*) of the western mid-Atlantic coast to

- 430 be residents rather than vagrants. PLoS One. 2015;10 1:e0116219.  
431 doi:10.1371/journal.pone.0116219.
- 432 13. Hendricks S, Anderson EC, Antao T, Bernatchez L, Forester BR, Garner B, et  
433 al. Recent advances in conservation and population genomics data analysis.  
434 Evol Appl. 2018;11 8:1197-211. doi:10.1111/eva.12659.
- 435 14. Marcalo A, Guerreiro PM, Bentes L, Rangel M, Monteiro P, Oliveira F, et al.  
436 Effects of different slipping methods on the mortality of sardine, *Sardina*  
437 *pilchardus*, after purse-seine capture off the Portuguese Southern coast  
438 (Algarve). PLoS One. 2018;13 5:e0195433.  
439 doi:10.1371/journal.pone.0195433.
- 440 15. Krueger F: "Trim galore" A wrapper tool around Cutadapt and FastQC to  
441 consistently apply quality and adapter trimming to FastQ files.  
442 [https://www.bioinformatics.babraham.ac.uk/projects/trim\\_galore/](https://www.bioinformatics.babraham.ac.uk/projects/trim_galore/) (2015).  
443 Accessed 9/24/2018.
- 444 16. Marcais G and Kingsford C. A fast, lock-free approach for efficient parallel  
445 counting of occurrences of k-mers. Bioinformatics. 2011;27 6:764-70.  
446 doi:10.1093/bioinformatics/btr011.
- 447 17. Vurture GW, Sedlazeck FJ, Nattestad M, Underwood CJ, Fang H, Gurtowski  
448 J, et al. GenomeScope: fast reference-free genome profiling from short reads.  
449 Bioinformatics. 2017;33 14:2202-4. doi:10.1093/bioinformatics/btx153.
- 450 18. Weisenfeld NI, Kumar V, Shah P, Church DM and Jaffe DB. Direct  
451 determination of diploid genome sequences. Genome Res. 2017;27 5:757-67.  
452 doi:10.1101/gr.214874.116.

- 453 19. Warren RL. RAILS and Cobbler: Scaffolding and automated finishing of draft  
454 genomes using long DNA sequences. *JOSS*. 2016;1 7:116.  
455 doi:10.21105/joss.00116.
- 456 20. Machado A, Tørresen O, Kabeya N, Couto A, Petersen B, Felício M, et al.  
457 “Out of the Can”: A draft genome assembly, liver transcriptome, and  
458 nutrigenomics of the European sardine, *Sardina pilchardus*. *Genes*. 2018;9  
459 10:485. doi:10.3390/genes9100485.
- 460 21. Earl D, Bradnam K, St John J, Darling A, Lin D, Fass J, et al. Assemblathon 1:  
461 a competitive assessment of de novo short read assembly methods. *Genome*  
462 *Res*. 2011;21 12:2224-41. doi:10.1101/gr.126599.111.
- 463 22. Weisenfeld NI, Kumar V, Shah P, Church DM and Jaffe DB. Direct  
464 determination of diploid genome sequences. *bioRxiv*. 2016:070425.  
465 doi:10.1101/070425.
- 466 23. Waterhouse RM, Seppey M, Simao FA, Manni M, Ioannidis P, Klioutchnikov  
467 G, et al. BUSCO applications from quality assessments to gene prediction  
468 and phylogenomics. *Mol Biol Evol*. 2017;35 3:543-8.  
469 doi:10.1093/molbev/msx319.
- 470 24. Bryant DM, Johnson K, DiTommaso T, Tickle T, Couger MB, Payzin-Dogru D,  
471 et al. A tissue-mapped axolotl *de novo* transcriptome enables identification of  
472 limb regeneration factors. *Cell Rep*. 2017;18 3:762-76.  
473 doi:10.1016/j.celrep.2016.12.063.
- 474 25. Smit A and Hubley R: RepeatModeler Open-1.0. <http://www.repeatmasker.org>  
475 (2008). Accessed 9/24/2018.

- 476 26. Hubley R, Finn RD, Clements J, Eddy SR, Jones TA, Bao W, et al. The Dfam  
477 database of repetitive DNA families. *Nucleic Acids Res.* 2016;44 D1:D81-9.  
478 doi:10.1093/nar/gkv1272.
- 479 27. Bao W, Kojima KK and Kohany O. Repbase Update, a database of repetitive  
480 elements in eukaryotic genomes. *Mob DNA.* 2015;6 1:11.  
481 doi:10.1186/s13100-015-0041-9.
- 482 28. Smit A, Hubley R and Green P: 2013–2015. RepeatMasker Open-4.0.  
483 <http://www.repeatmasker.org> (2013).
- 484 29. Holt C and Yandell M. MAKER2: an annotation pipeline and genome-  
485 database management tool for second-generation genome projects. *BMC*  
486 *Bioinformatics.* 2011;12 1:491. doi:10.1186/1471-2105-12-491.
- 487 30. Camacho C, Coulouris G, Avagyan V, Ma N, Papadopoulos J, Bealer K, et al.  
488 BLAST+: architecture and applications. *BMC Bioinformatics.* 2009;10:421-  
489 doi:10.1186/1471-2105-10-421.
- 490 31. Korf I. Gene finding in novel genomes. *BMC Bioinformatics.* 2004;5 1:59.  
491 doi:10.1186/1471-2105-5-59.
- 492 32. Stanke M and Waack S. Gene prediction with a hidden Markov model and a  
493 new intron submodel. *Bioinformatics.* 2003;19 suppl\_2:ii215-ii25.  
494 doi:10.1093/bioinformatics/btg1080.
- 495 33. Lomsadze A, Burns PD and Borodovsky M. Integration of mapped RNA-Seq  
496 reads into automatic training of eukaryotic gene finding algorithm. *Nucleic*  
497 *Acids Res.* 2014;42 15:e119. doi:10.1093/nar/gku557.
- 498 34. Apweiler R, Bairoch A, Wu CH, Barker WC, Boeckmann B, Ferro S, et al.  
499 UniProt: the Universal Protein knowledgebase. *Nucleic Acids Res.* 2004;32  
500 Database issue:D115-9. doi:10.1093/nar/gkh131.

- 501 35. Jones P, Binns D, Chang HY, Fraser M, Li W, McAnulla C, et al. InterProScan  
502 5: genome-scale protein function classification. *Bioinformatics*. 2014;30  
503 9:1236-40. doi:10.1093/bioinformatics/btu031.
- 504 36. Finn RD, Attwood TK, Babbitt PC, Bateman A, Bork P, Bridge AJ, et al.  
505 InterPro in 2017—beyond protein family and domain annotations. *Nucleic  
506 Acids Res*. 2016;45 D1:D190. doi:10.1093/nar/gkw1107.
- 507 37. Sardine Genome Annotation Portal.  
508 <https://bioinformatics.psb.ugent.be/orcae/overview/Spil>. Accessed 9/24/2018.
- 509 38. Sterck L, Billiau K, Abeel T, Rouze P and Van de Peer Y. ORCAE: online  
510 resource for community annotation of eukaryotes. *Nat Methods*. 2012;9  
511 11:1041. doi:10.1038/nmeth.2242.
- 512 39. Emms DM and Kelly S. OrthoFinder: solving fundamental biases in whole  
513 genome comparisons dramatically improves orthogroup inference accuracy.  
514 *Genome Biol*. 2015;16 1:157. doi:10.1186/s13059-015-0721-2.
- 515 40. Bardou P, Mariette J, Escudie F, Djemiel C and Klopp C. jvenn: an interactive  
516 Venn diagram viewer. *BMC Bioinformatics*. 2014;15 1:293. doi:10.1186/1471-  
517 2105-15-293.
- 518 41. Zheng GX, Lau BT, Schnall-Levin M, Jarosz M, Bell JM, Hindson CM, et al.  
519 Haplotyping germline and cancer genomes with high-throughput linked-read  
520 sequencing. *Nat Biotechnol*. 2016;34 3:303-11. doi:10.1038/nbt.3432.
- 521 42. McKenna A, Hanna M, Banks E, Sivachenko A, Cibulskis K, Kernytsky A, et  
522 al. The Genome Analysis Toolkit: A MapReduce framework for analyzing  
523 next-generation DNA sequencing data. *Genome Res*. 2010;20 9:1297-303.  
524 doi:10.1101/gr.107524.110.

- 525 43. Han Z, Li W, Zhu W, Sun S, Ye K, Xie Y, et al. Near-complete genome  
526 assembly and annotation of the yellow drum (*Nibea albiflora*) provide insights  
527 into population and evolutionary characteristics of this species. Ecology and  
528 Evolution. 2019;9 1:568-75. doi:doi:10.1002/ece3.4778.
- 529 44. Barrio AM, Lamichhaney S, Fan GY, Rafati N, Pettersson M, Zhang H, et al.  
530 The genetic basis for ecological adaptation of the Atlantic herring revealed by  
531 genome sequencing. Elife. 2016;5:e12081. doi:10.7554/eLife.12081.
- 532 45. Amemiya CT, Alföldi J, Lee AP, Fan SH, Philippe H, MacCallum I, et al. The  
533 African coelacanth genome provides insights into tetrapod evolution. Nature.  
534 2013;496 7445:311-6. doi:10.1038/nature12027.
- 535 46. Star B, Nederbragt AJ, Jentoft S, Grimholt U, Malmstrom M, Gregers TF, et  
536 al. The genome sequence of Atlantic cod reveals a unique immune system.  
537 Nature. 2011;477 7363:207-10. doi:10.1038/nature10342.
- 538 47. Jones FC, Grabherr MG, Chan YF, Russell P, Mauceli E, Johnson J, et al.  
539 The genomic basis of adaptive evolution in threespine sticklebacks. Nature.  
540 2012;484 7392:55-61. doi:10.1038/nature10944.
- 541 48. Martin M. Cutadapt removes adapter sequences from high-throughput  
542 sequencing reads. EMBnet journal. 2011;17 1:10-2. doi:10.14806/ej.17.1.200.
- 543 49. Andrews S: FastQC: a quality control tool for high throughput sequence data.  
544 <http://www.bioinformatics.babraham.ac.uk/projects/fastqc/> (2010). Accessed  
545 9/24/2018.
- 546 50. Haas BJ, Papanicolaou A, Yassour M, Grabherr M, Blood PD, Bowden J, et  
547 al. De novo transcript sequence reconstruction from RNA-seq using the Trinity  
548 platform for reference generation and analysis. Nat Protoc. 2013;8 8:1494-  
549 512. doi:10.1038/nprot.2013.084.

- 550 51. Smith-Unna R, Bournnell C, Patro R, Hibberd JM and Kelly S. TransRate:  
551 reference-free quality assessment of de novo transcriptome assemblies.  
552 Genome Res. 2016;26 8:1134-44. doi:10.1101/gr.196469.115.
- 553 52. Finn RD, Clements J and Eddy SR. HMMER web server: interactive  
554 sequence similarity searching. Nucleic Acids Res. 2011;39 Web Server  
555 issue:W29-37. doi:10.1093/nar/gkr367.
- 556 53. Eddy SR. Profile hidden Markov models. Bioinformatics. 1998;14 9:755-63.
- 557 54. Castresana J. Selection of conserved blocks from multiple alignments for their  
558 use in phylogenetic analysis. Mol Biol Evol. 2000;17 4:540-52. doi:DOI  
559 10.1093/oxfordjournals.molbev.a026334.
- 560 55. Foster PG. Modeling compositional heterogeneity. Syst Biol. 2004;53 3:485-  
561 95.
- 562 56. Kalyaanamoorthy S, Minh BQ, Wong TKF, von Haeseler A and Jeremiin LS.  
563 ModelFinder: fast model selection for accurate phylogenetic estimates. Nat  
564 Methods. 2017;14 6:587-9. doi:10.1038/nmeth.4285.
- 565 57. Nguyen LT, Schmidt HA, von Haeseler A and Minh BQ. IQ-TREE: a fast and  
566 effective stochastic algorithm for estimating maximum-likelihood phylogenies.  
567 Mol Biol Evol. 2015;32 1:268-74. doi:10.1093/molbev/msu300.
- 568 58. Jones DT, Taylor WR and Thornton JM. The rapid generation of mutation  
569 data matrices from protein sequences. Comput Appl Biosci. 1992;8 3:275-82.
- 570 59. Stamatakis A. RAxML version 8: a tool for phylogenetic analysis and post-  
571 analysis of large phylogenies. Bioinformatics. 2014;30 9:1312-3.  
572 doi:10.1093/bioinformatics/btu033.
- 573
- 574



575 Table 1. Descriptive metrics, estimated by Supernova, of the input sequence data for  
576 the *de novo* genome assembly.

|                                         |           |
|-----------------------------------------|-----------|
| Number of paired reads used             | 607.36 M  |
| Mean read length after trimming         | 138.50 bp |
| Median insert size                      | 345 bp    |
| Weighted mean DNA molecule size         | 46.41 Kb  |
| N50 reads per barcode                   | 612       |
| Raw coverage                            | 78.35 X   |
| Effective read coverage                 | 52.91 X   |
| Mean distance between heterozygous SNPs | 197 bp    |

577

578

579

580 Table 2. Descriptive metrics of sardine genome assemblies. SP\_haploid1/  
 581 SP\_haploid2: haploids genomes ([UOTT01000000](#) and [UOTU01000000](#)). SP\_G:  
 582 consensus genome (NCBI representative genome assembly, GCA\_900499035.1).  
 583 UP\_Spi: Illumina paired-end assembled genome from [20] (GCA\_003604335.1).  
 584 Values for scaffolds equal or larger than 1Kb, 10Kb and 100 Kb are presented in  
 585 separated rows.

| <b>Scaffolds</b>      | <b>Spil_haploid1</b> | <b>Spil_haploid2</b> | <b>SP_G</b>          | <b>UP_Spi</b>           |
|-----------------------|----------------------|----------------------|----------------------|-------------------------|
| <b>Largest</b>        | 6.835 Mb             | 6.850 Mb             | 6.843 Mb             | 0.285 Mb                |
| <b>Number</b>         |                      |                      |                      |                         |
| >=100Kb               | 874                  | 872                  | 890                  | 309                     |
| >= 10Kb               | 8 301                | 8 298                | 8 760                | 18 863                  |
| >= 1Kb (total)        | 117 698              | 117 698              | 117 259              | 44 627                  |
| <b>L50 / N50</b>      |                      |                      |                      |                         |
| >=100Kb               | 135 / 906.0 Kb       | 134 / 925.2 Kb       | 137 / 899.1 Kb       | 130 / 122.5 Kb          |
| >= 10Kb               | 242 / 572.7 Kb       | 242 / 568.2 Kb       | 254 / 552.2 Kb       | 4 594 / 32.9 Kb         |
| >= 1Kb (total)        | 859 / 102.9 Kb       | 860 / 102.7 Kb       | 903 / 96.6 Kb        | 6 797 / 25.6 Kb         |
| <b>LG50/NG50</b>      | <b>935 / 87.7 Kb</b> | <b>939 / 87.1 Kb</b> | <b>905 / 96.6 Kb</b> | <b>15 422 / 12.6 Kb</b> |
| <b>Assembly size</b>  |                      |                      |                      |                         |
| >=100Kb               | 469.371 Mb           | 468.838 Mb           | 473.550 Mb           | 39.274 Mb               |
| >= 10Kb               | 622.165 Mb           | 621.688 Mb           | 636.491 Mb           | 513.719 Mb              |
| >= 1Kb (total)        | 935.548 Mb           | 935.082 Mb           | 949.618 Mb           | 641.169 Mb              |
| <b>GC content</b>     | 43.9 %               | 43.9 %               | 43.9 %               | 44.5 %                  |
| <b>N's per 100 Kb</b> | 12 955               | 12 961               | 12 834               | 169                     |

587

588

589 Table 3 – Summary statistics of transcriptome data for the eleven tissues.

| Tissue                              | Paired raw reads | Contigs | CDS deduced | SwissProt annotated | Accession number |
|-------------------------------------|------------------|---------|-------------|---------------------|------------------|
| Gill/Branchial Arch                 | 29 783 994       | 62 526  | 29.3%       | 38.6%               | ERS2629269       |
| Liver                               | 33 479 471       | 53 104  | 29.7%       | 40.1%               | ERS2629273       |
| Spleen                              | 25 634 530       | 66 419  | 31.6%       | 40.4%               | ERS2629276       |
| Ovary                               | 22 241 327       | 42 521  | 38.1%       | 42.5%               | ERS2629270       |
| Midgut                              | 28 016 117       | 75 782  | 31.0%       | 39.5%               | ERS2629274       |
| White Muscle                        | 24 409 160       | 49 266  | 35.4%       | 44.8%               | ERS2629277       |
| Red Muscle                          | 30 653 774       | 55 873  | 30.3%       | 42.1%               | ERS2629275       |
| Kidney                              | 27 861 879       | 59 495  | 30.8%       | 37.3%               | ERS2629272       |
| Head Kidney                         | 25 280 960       | 65 888  | 32.2%       | 38.4%               | ERS2629271       |
| Brain/Pituitary                     | 24 467 352       | 75 620  | 24.5%       | 37.1%               | ERS2629267       |
| Caudal Fin<br>(Skin/Cartilage/Bone) | 26 342 097       | 64 832  | 23.9%       | 38.0%               | ERS2629268       |
| All Tissues                         | 298 170 661      | 170 478 | 15.9%       | 25.5%               | ERS2629362       |

590

591

592

## 593 Figure legends

594 Figure 1. The European sardine, *Sardina pilchardus* (photo credit ©Eduardo Soares,  
595 IPMA)

596

597 Figure 2. The histogram of the 23-mer depth distribution was plotted in  
598 GenomeScope [17] to estimate genome size (907Mb), repeat content (40.7%) and  
599 heterozygosity level (1.43%). Two kmer coverage peaks are observed at 28X and  
600 50X.

601

602 Figure 3. Optimal maximum likelihood tree (-ln likelihood: 146565.6438) under a  
603 best-fitting JTT+ $\Gamma_4$ +F substitution model of 97 concatenated proteins. Maximum  
604 likelihood bootstrap support values are given below or to the right of nodes. Scale  
605 bar represents mean numbers of substitutions per site. The Actinopterygii ingroup  
606 was rooted to two outgroup taxa, namely *Petromyzon marinus* (lamprey) and  
607 *Latimeria chalumnae* (coelacanth) (not shown).

608

609 Figure 4. Venn diagram representing paralogous and orthologous groups  
610 between sardine, blind cave fish, zebrafish, and herring obtained with OrthoFinder  
611 and plotted with Jvenn [40]. Orthogroups of singleton genes are showed in  
612 parenthesis.

613

## 614 Additional files

615 **Additional file 1.** Heterozygous SNPs identified in the phased haploid blocks listed

616 in a VCF file format.

617

618 **Additional file 2.** Annotation of all tissues transcriptome assembly in a tabular

619 format.

620

621 **Additional file 3.** Sequence alignment statistics of the 97 proteins concatenated for

622 the phylogenetics analyses.



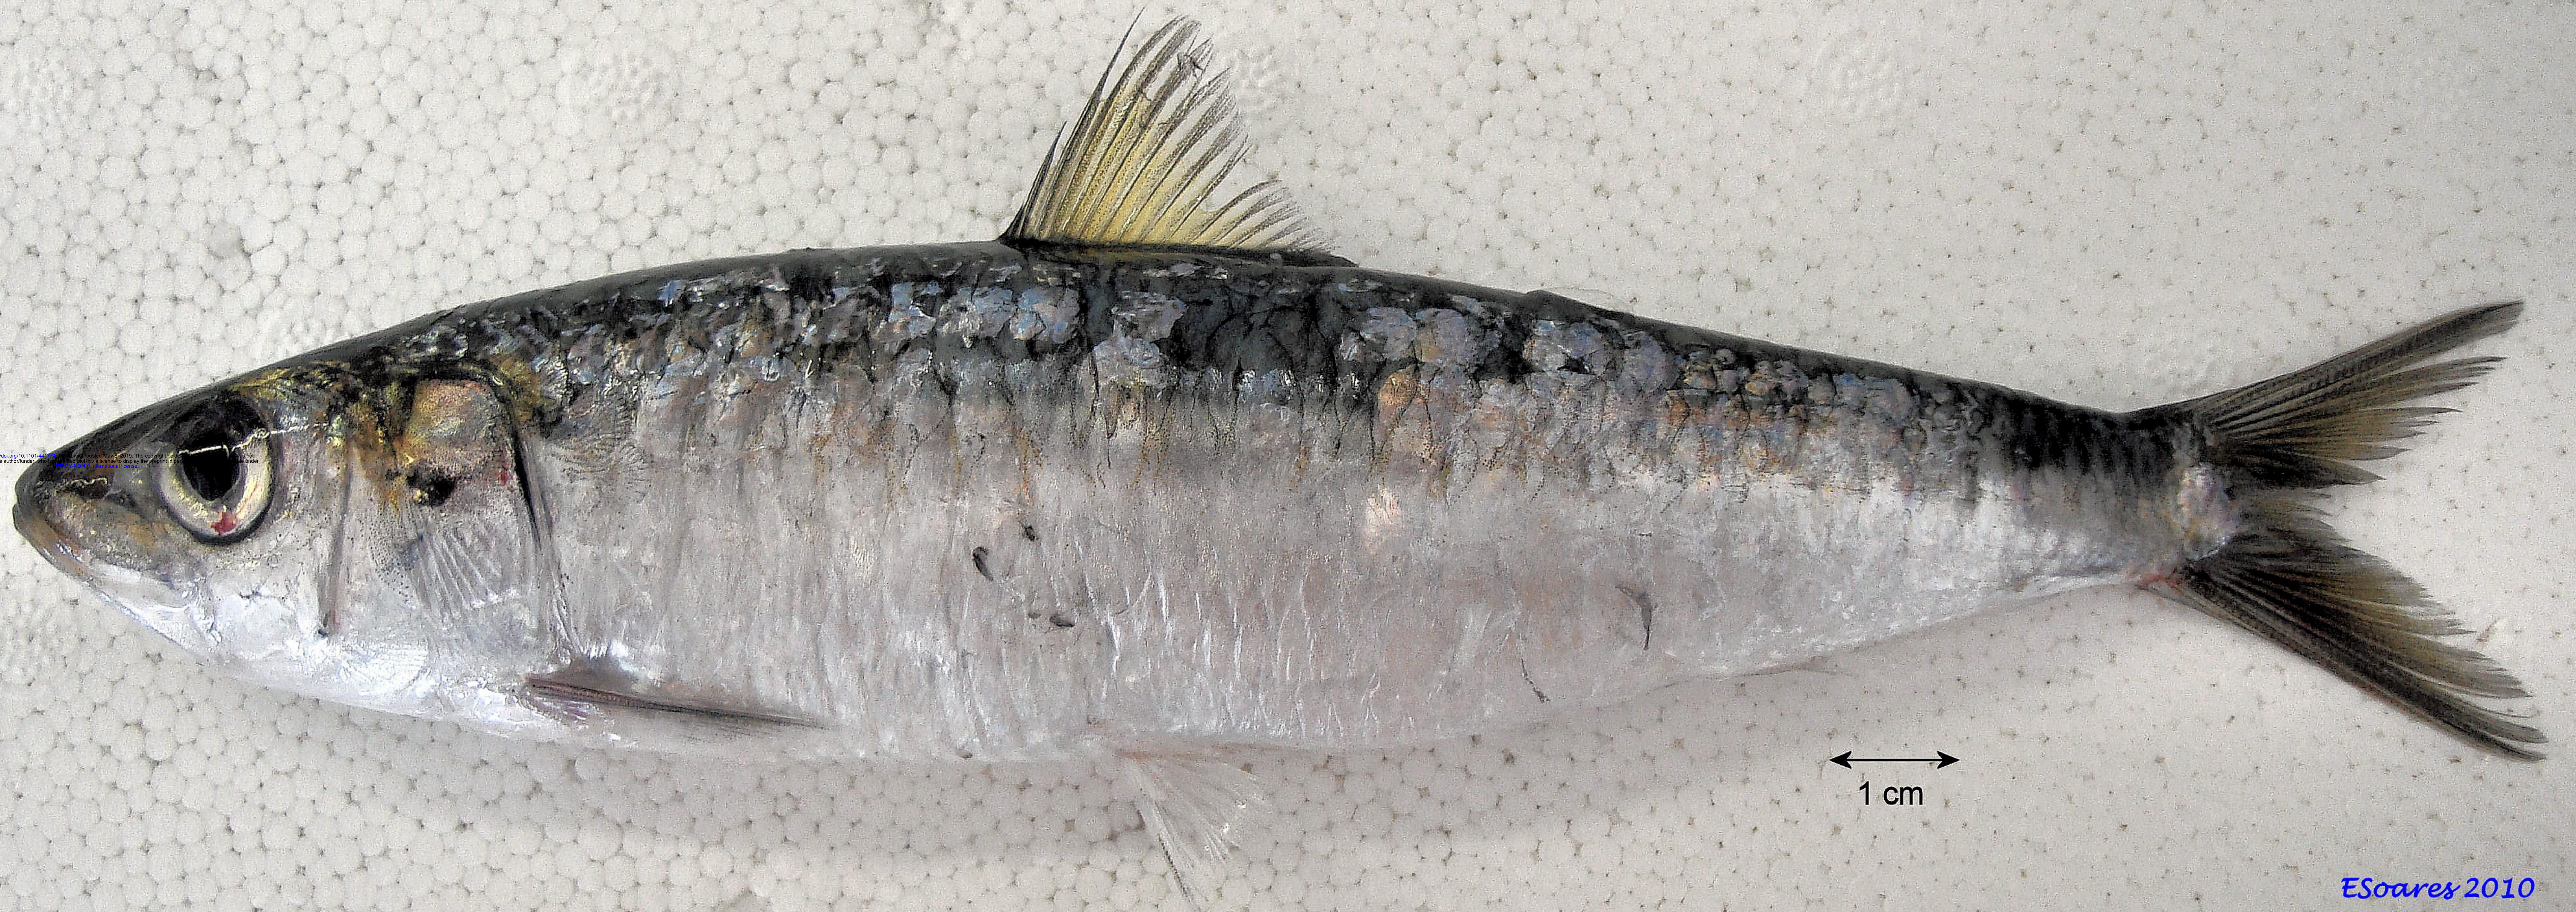



# GenomeScope Profile

len:907,057,586bp uniq:59.3% het:1.43% kcov:27.9 err:0.979% dup:2.57% k:23

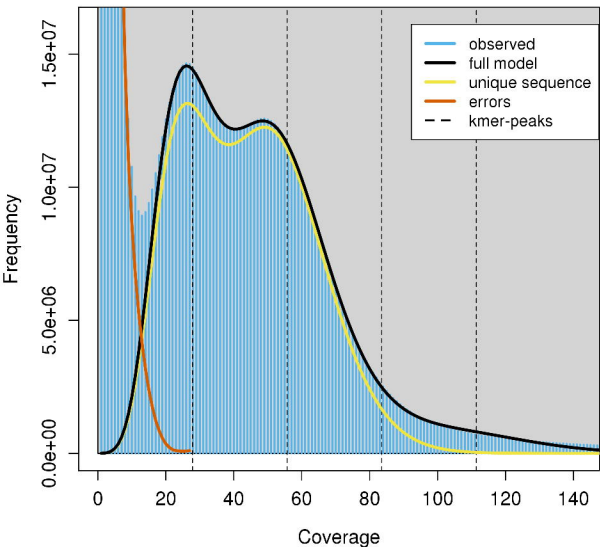

*Astyanax mexicanus*

*Clupea harengus*

*Sardina pilchardus*

*Danio rerio*

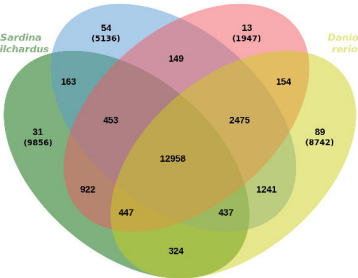



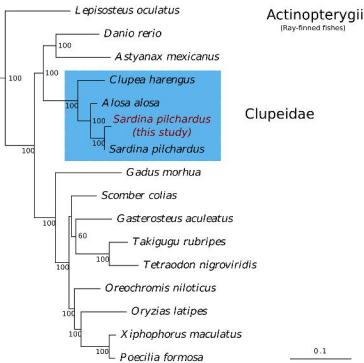

Source: https://www.biorxiv.org/content/10.1101/441774v2.full.pdf
